# Supplementary material
Source: Springer Nature journal article supplement (https://www.springermedizin.de/resource/supplementary/13054_2010_8373_MOESM2_ESM.pdf/9731820)
Supplement: MOESM2 [file 9731820]

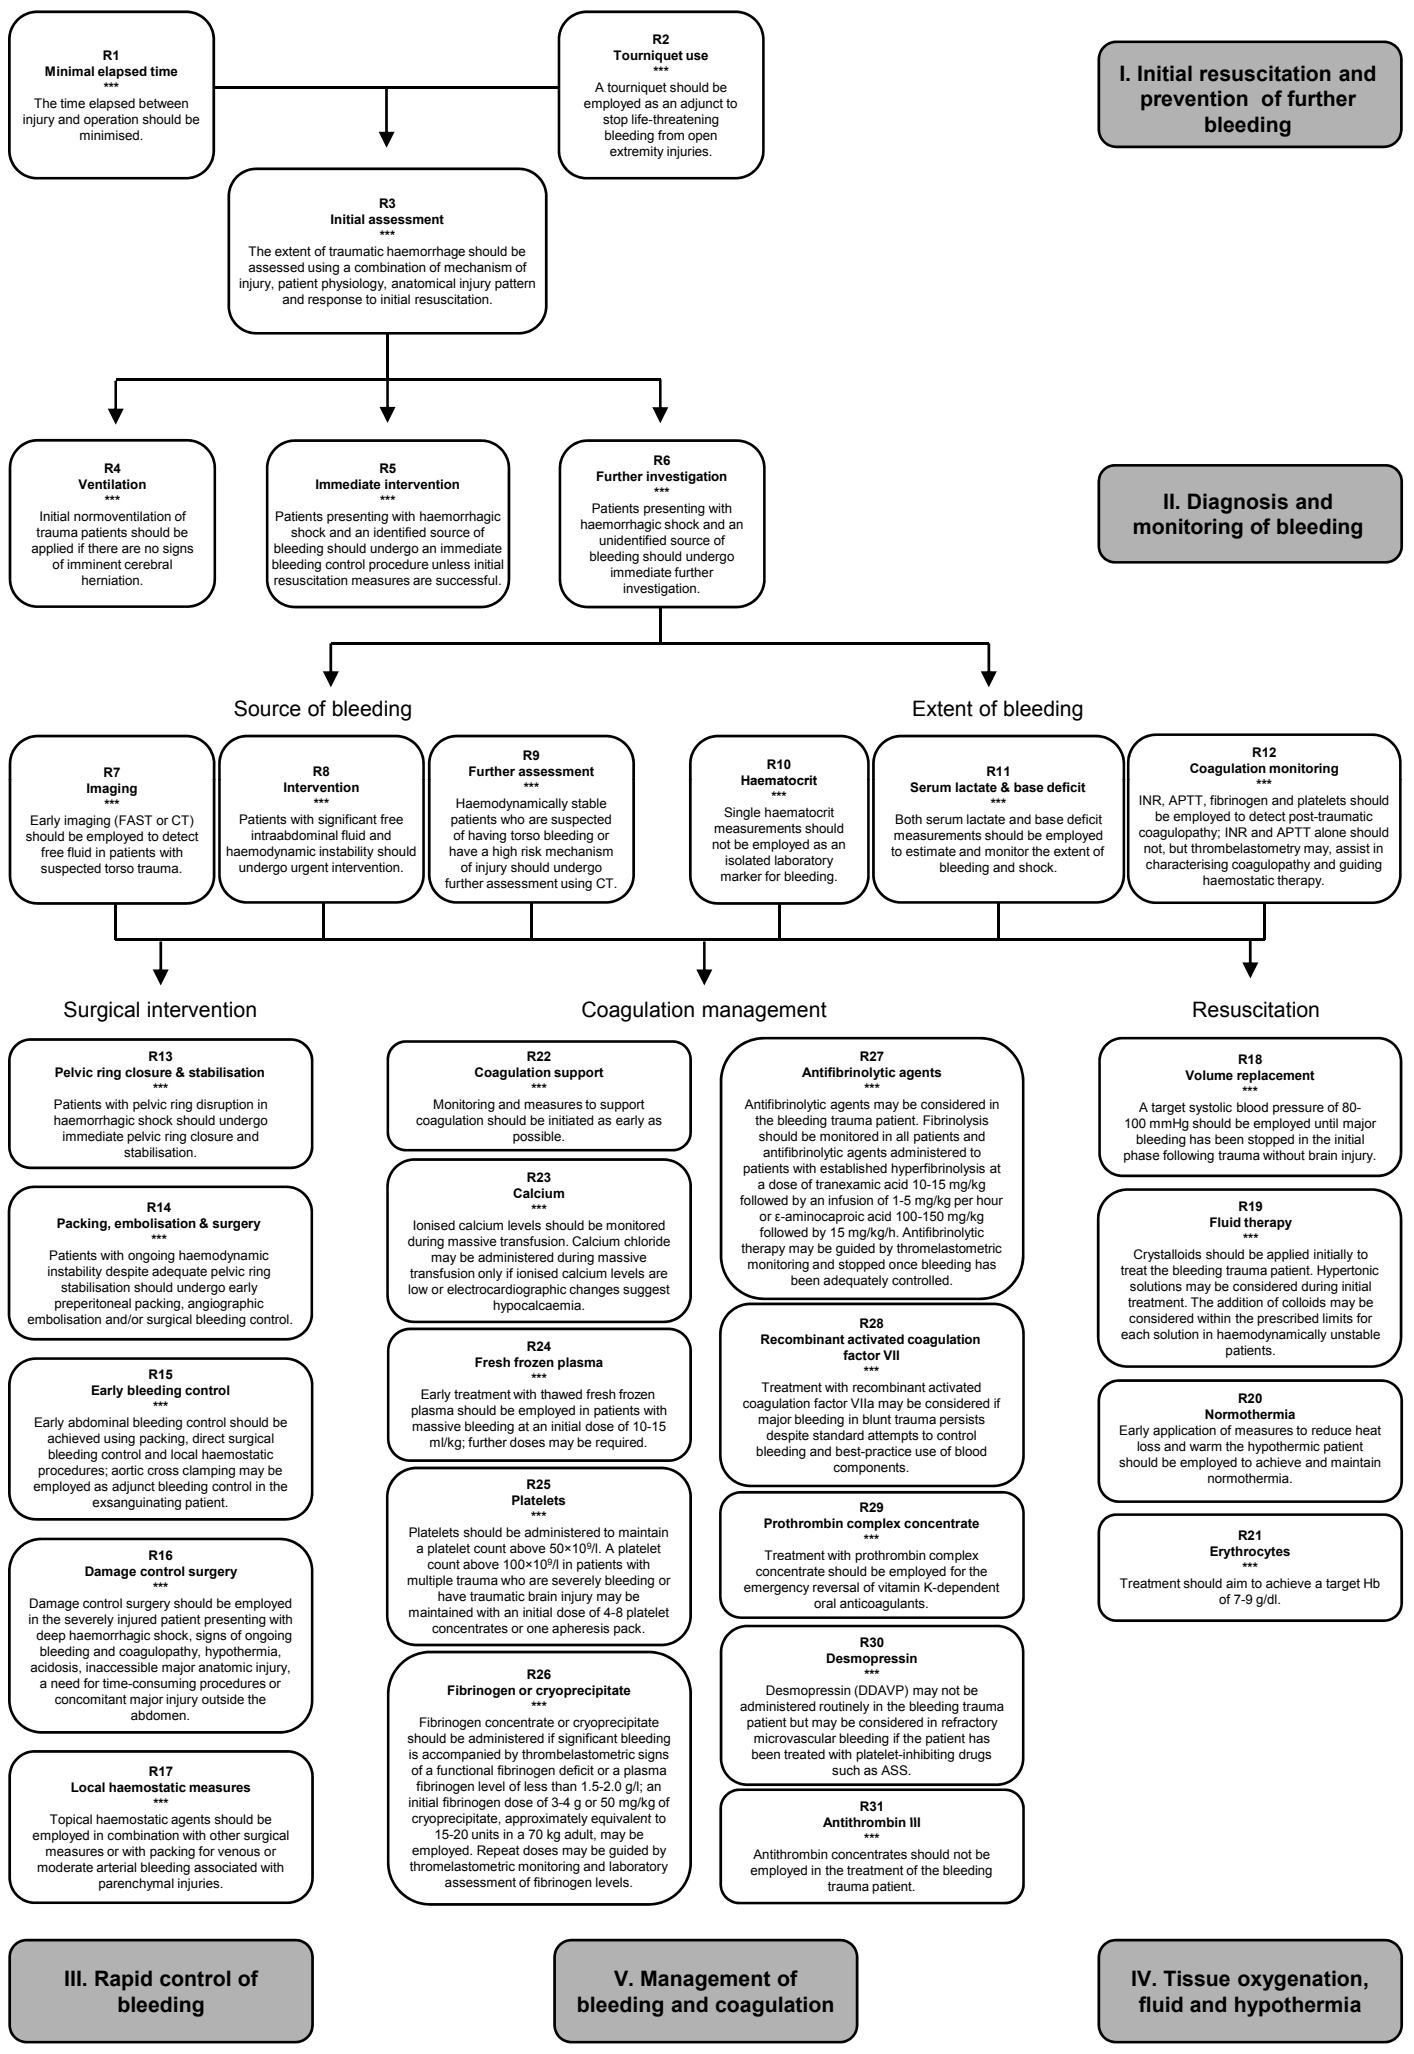

**I. Initial resuscitation and prevention of further bleeding**

**II. Diagnosis and monitoring of bleeding**

**Source of bleeding**

**Extent of bleeding**

**Surgical intervention**

**Coagulation management**

**Resuscitation**

**III. Rapid control of bleeding**

**V. Management of bleeding and coagulation**

**IV. Tissue oxygenation, fluid and hypothermia**
